# Quality assessment of tissue samples stored in a specialized human lung biobank

M. Lindner<sup>1</sup>, A. Morresi-Hauf<sup>2</sup>, A. Stowasser<sup>1</sup>, A. Hapfelmeier<sup>3</sup>, R. Hatz<sup>1</sup>, I. Koch<sup>1\*</sup>

<sup>1</sup>Asklepios Biobank for Lung Diseases, Department of Thoracic Surgery, Asklepios Fachkliniken München-Gauting, 82131 Gauting, Germany; Member of the German Center for Lung Research – DZL

<sup>2</sup>Asklepios Biobank for Lung Diseases, Department of Pathology, Asklepios Fachkliniken München-Gauting, 82131 Gauting, Germany; Member of the German Center for Lung Research – DZL

<sup>3</sup> Institute of Medical Informatics, Statistics and Epidemiology, Klinikum rechts der Isar, Technical University Munich, 81675 Munich, Germany

\*Corresponding author

## 1 **Abstract**

2 Human sample, from patients or healthy donors, are a valuable link between basic  
3 research and clinic. Especially in translational research, they play an essential role in  
4 understanding development and progression of diseases as well as in developing  
5 new diagnostic and therapeutic tools. Stored in biobanks, fast access to appropriate  
6 material becomes possible. However, biobanking in a clinical context faces several  
7 challenges. In practice, collecting samples during clinical routine does not allow to  
8 strictly adhere to protocols of sample collection in all aspects. This may influence  
9 sample quality to variable degrees. Time from sample draw to asservation is a  
10 variable factor, and influences of prolonged storage at ambient temperature of  
11 tissues are not well understood. We investigated whether delays between 5 minutes  
12 and 3 hours, and the use of RNAlater RNA-preserving reagent would lead to a  
13 relevant drop in sample quality, measured by quantitative mRNA expression analysis.  
14 Our findings suggest that even under ambient conditions, delays up to 3 hours do not  
15 have a major impact on sample quality as long as the tissue remains intact.

16

## 17 **Introduction**

18 In 2008, a biobank was founded at the Asklepios Clinics in Gauting, a clinic  
19 specialized on thoracic diseases. By the end of 2017, it contained solid tissue and  
20 liquid biomaterials from nearly 4000 patients, up to 45.000 aliquots. 12.000 of these  
21 are aliquots of solid tissue samples of tumor and peritumor tissue from patients  
22 suffering from various bronchial carcinomas, lung metastasis of other types of cancer  
23 and tissue from benign thoracic malignancies. Serum, plasma, BALF fluids, cell  
24 pellets and pleural effusions are collected, whenever possible as paired samples.

25 The Biobank is integrated into the German Center for Lung Research (DZL).  
26 Biobanks at all sites of the DZL aim to collect samples according to harmonized  
27 Standard Operation Procedures, making samples comparable among the sites and  
28 their usage in common scientific projects reliable.  
29  
30 After obtaining patients' broad informed consent, based on the suggestions of the  
31 German Ethics Council, samples are collected during routine clinical procedures.  
32 With the exception of blood specimens, only clinical remains are stored. Tissues are  
33 collected after diagnostic procedures have been completed. Some effects affecting  
34 sample quality cannot be influenced, like warm ischemic time (i.e. the time between  
35 truncation of the blood supply and removal of the tissue from the body), others can  
36 be controlled more or less satisfactorily. Delay between withdrawal from the body and  
37 asservation is kept as short as possible, but is subject to variation due to clinical  
38 routines. This means, that standardization of sample collection is a challenge, which  
39 cannot regularly be met in everyday clinical life to a full extent. Nevertheless, the aim  
40 is to gain samples of highest quality, suitable for a variety of scientific questions and  
41 methods including molecular biological analyses like expression profiling.  
42  
43 Collection of solid samples is often done by snap freezing in liquid nitrogen, followed  
44 by long-term storage at -80 °C or in liquid nitrogen. This guarantees conservation of  
45 biological processes at the moment of freezing, however is difficult to integrate into  
46 the clinical routine. Alternatives such as incubating samples in protecting reagents  
47 like RNAlater® or ProtectAll® before freezing are gaining more and more  
48 importance(1-3). This study aims to compare snap freezing and incubation in an RNA  
49 stabilizing reagent with regard to sample stability, nucleic acid recovery and

50 reproducibility of mRNA expression measurements. Influences of pre-freezing delays  
51 are also addressed.

52

## 53 **Materials and Methods**

54 The Asklepios Biobank for Lung Diseases was approved by the Ethical Committee of  
55 the Ludwig-Maximilians-University of Munich in February 2011 (Project-No. 330-10)

56

### 57 **Tissue collection**

58 Tissue samples after operative procedures are routinely collected by a pathologist in  
59 parallel to diagnostic procedures. Samples not required for patients' diagnosis are  
60 made accessible to the biobank. In a standardized fashion, samples from 4 patients  
61 were processed after 5 ( $\pm 2$ ), 20 ( $\pm 5$ ), 60 ( $\pm 10$ ), and 180 ( $\pm 10$ ) minutes of cold  
62 ischemic time to mimic variability in clinical sampling. Patients' characteristics are  
63 summarized in table 1. At each time point, pieces cut to a maximum size of 5x5x5  
64 mm were either snap frozen in liquid nitrogen before storing at -80 °C, or transferred  
65 to RNAlater™ (Quiagen, Hilden, Germany). RNAlater samples were left at 4 °C for 24  
66 h or 7 days, before the RNAlater was discarded and samples were stored dry at -80  
67 °C without snap freezing. Thus, a set of 12 samples (4 time points and 3 methods)  
68 was generated for each patient. (Fig 1).

69

71 **Table 1. Patients' characteristics**

| Patient No | Sex    | Age | Diagnosis                           | Stage |
|------------|--------|-----|-------------------------------------|-------|
| 1          | male   | 74  | Large cell carcinoma neuroendocrine | Ib    |
| 2          | male   | 73  | Adenocarcinoma                      | IIb   |
| 3          | female | 53  | Squamous cell carcinoma             | IIa   |
| 4          | female | 54  | Typical carcinoid                   | Ib    |

72

73 **Fig. 1. Experimental design**

74 Tumor tissue samples from 4 lung cancer patients were cut into aliquots and  
75 processed after 4 different periods of time, with 3 different methods before long term  
76 storage and subsequent RNA isolation.

77

78 **Sample Processing, nucleic acid extraction and cDNA**

79 **synthesis**

80 Frozen samples were mounted on a precooled object plate for cutting in a NX70  
81 microtome (Thermo Fisher Scientific, Waltham, Massachusetts) at -30°C, using  
82 MX35 tempered microtome blades for hard tissue (Fisher Scientific, Waltham,  
83 Massachusetts) . After trimming, a 4 µm section was cut for HE staining and  
84 pathological evaluation. 5 x 10 µm sections were cut for RNA isolation, followed by  
85 another 4 µm HE section, before 5 x 10 µm section were cut for DNA isolation and a  
86 final 4 µm HE section.

87 RNA and DNA were isolated using RNeasy Mini Kit or QiaAmp Mini Kit (Qiagen,  
88 Hilden, Germany) respectively, according to the manufacturer's instructions. Quantity

89 and quality of nucleic acids was assessed by measuring OD at 260/280 nm in a P330  
90 nano photometer (Implen, Munich, Germany) and determination of RIN values (only  
91 RNA) using the Agilent 2100 BioAnalyser™ (Agilent Technologies, Waldborn,  
92 Germany). 1 µg of total RNA was reversed transcribed into cDNA using random  
93 hexamer primers and superscript II reverse transcriptase (Life Technologies /  
94 ThermoFisher Scientific, Waltham, Massachusetts).

95

## 96 **Real-Time qPCR**

97 RT-qPCR Assays for EGFR, ERCC1, RRM1 and HIF1 and TBP as a so called  
98 housekeeping gene were performed on LC480 light cycler (Roche, Mannheim,  
99 Germany), either using a SYBR-Green assay (MesaBlue, Eurogentec, Liège,  
100 Belgium), or light cycler FRET probes from Roche's universal probe library. Primers  
101 and probes and cycling parameters are depicted in table 2. 18S rRNA was used to  
102 normalize expression levels. Expression values were expressed as absolute  
103 expression levels (copies/18S) for each gene, or as relative expression levels to the  
104 average expression measured in the 12-sample set of each patient to make  
105 intersample differences easily comparable among different genes, regardless of their  
106 absolute expression levels.

107

109 Table 2. Real-time qRT-PCR Assays

110 A:

| <b>18S rRNA</b> | <b>Primer</b>             | <b>concentration</b> |
|-----------------|---------------------------|----------------------|
| Forward         | CCCTGTAATTGGAATGAGTCCAC   | 300 nM               |
| Reverse         | GCTGGAATTACCGCGGCT        | 300 nM               |
| <b>TBP</b>      |                           |                      |
| Forward         | GCTGGCCCATAGTGATCTTT      | 300 nM               |
| Reverse         | TCCTTGGGTTATCTTCACACG     | 300 nM               |
| <b>EGFR</b>     |                           |                      |
| Forward         | ACACAGAATCTATACCCACCAGAGT | 300 nM               |
| Reverse         | ATCAACTCCCAAACGGTCAC      | 300 nM               |
| <b>ERCC1</b>    |                           |                      |
| Forward         | CGGACCTCCTGATGGAGA        | 300 nM               |
| Reverse         | CACGGTGGTCAGACATTCAG      | 300 nM               |
| <b>RRM1</b>     |                           |                      |
| Forward         | CCAGAAGCTTTGTTATGGACTCA   | 300 nM               |
| Reverse         | GCCTTGGATTACTTTCATGGTG    | 300 nM               |

|       |         |      |
|-------|---------|------|
| 95 °C | 05:00   |      |
| 95 °C | 00:05   | 45 x |
| 60 °C | 00:30   |      |
| 72 °C | 00:10   |      |
| 95 °C | 00:05   |      |
| 60 °C | 01:00   |      |
| 97 °C | melting |      |
| 40 °C | 00:01   |      |

111

112 B:

| <b>HIF1</b> | <b>Primer</b>           | <b>concentration</b> |
|-------------|-------------------------|----------------------|
| Forward     | TTTTTCAAGCAGTAGGAATTGGA | 300 nM               |
| Reverse     | GTGATGTAGTAGCTGCATGATCG | 300 nM               |
| Probe       | Roche UPL Probe 66      | 125 nM               |

113

|       |       |      |
|-------|-------|------|
| 95 °C | 05:00 |      |
| 95 °C | 00:05 | 45 x |
| 60 °C | 00:30 |      |
| 72 °C | 00:10 |      |
| 40 °C | 00:01 |      |

114

115 A: SybrGreen Assays; B: Light-Cycler FRET-Probe Assay

116

## 118 **Statistical analysis**

119 Statistical analysis was performed using IBM SPSS Statistics for Windows, version  
120 23 (IBM Corp., Armonk, N.Y., USA) and R 3.4.2 (R Foundation for Statistical  
121 Computing, Vienna, Austria). The distribution of qualitative and quantitative variables  
122 is described by absolute and relative frequencies and means  $\pm$  standard deviation,  
123 respectively. Repeated measures ANOVA was used for hypothesis testing of  
124 differences in asservation methods and time points. Bland-Altman analyses were  
125 performed by the alternating regressions approach to account for repeated  
126 measurements and assuming a constant bias in the conversion of methods (4). All  
127 statistical tests were conducted on two-sided, exploratory 5% significance levels.

128

## 129 **Results**

130 Except for the standardized delay times, sample collection fully resembled the routine  
131 collection procedure. Delay times were chosen to mimic the intersample variability  
132 regularly imposed onto the samples on their way from the operation room to  
133 pathology and finally to the biobank, whereat a delay time of less than 5 minutes is  
134 essentially never met during daily collection. Most of the samples reach the biobank  
135 within 20 minutes of cold ischemic time, and all samples with cold ischemic times of  
136 more than 60 minutes are usually discarded.

137

## 138 **Histological evaluation**

139 Pathological examination is critical before using archived human material. We  
140 compared HE-stained slices of fresh frozen or RNAlater preserved tissue. To be able  
141 to cut tissue samples treated with RNAlater, it turned out to be necessary to cool the



142 cryostat to -30 °C to ensure the sample kept frozen, and to use tempered blades  
143 normally used to cut hard tissues like bone. Doing so, we were able to cut these  
144 tissues without removing RNAlater. Both – tissue that was snap frozen and tissue  
145 preserved in RNAlater, were equally well suited for histological evaluation (Fig. 2)

146

## 147 **Fig. 2. Histological evaluation**

148 HE stained histological section of adenocarcinoma, patient 2.

149 A: tissue preserved in RNAlater for 1 day; B: tissue snap frozen in liquid N<sub>2</sub>

150

## 151 **Influence of asservation method and cold ischemic times** 152 **on nucleic acid quantity and quality**

153 Due to the heterogeneity of the tissue, the quantity of nucleic acids isolated from the  
154 tissue specimens is influenced by a variety of factors such as tissue size, cell  
155 number, percentage of necrosis etc.. It is assumed that DNA would be stable under  
156 all conditions tested. RNA quantity relative to DNA quantity was also rather stable,  
157 regardless of shorter or longer ischemic times (data not shown). With regard to RNA  
158 quality, we measured the RIN values (RNA integrity number) for all samples. RIN  
159 values showed negligible variation. 60 % (29) of all samples had RIN values of 9 or  
160 higher, 27 % (13) of 8-9, 10 % (5) of 7-8 and 2 % (1) of lower than 7, with a mean of  
161 9.07 (SD 0.86). There was only a minor difference between mean RIN values of  
162 fresh frozen tissues samples and RNAlater preserved ones (9.04, SD 0.86) vs. 9.08,  
163 SD 0.86, Fig.3.).

164 RIN-values – whether from tissue preserved in RNAlater or fresh frozen in liquid  
165 nitrogen - were not notably influenced by prolonged ischemic times up to 3 hours.

166 Mean RIN values were 9.18 (SD 0.66) for an ischemic delay of 5 minutes, 8.79 (SD

167 1.11) for 20 minutes, 9.13 (SD 0.84) for 60 minutes and 9.14 (SD 0.69) for 180  
168 minutes .

169

170 **Fig. 3. Influence of cold ischemic time and asservation procedure on RNA**  
171 **quality**

172 Overall RNA quality isolated was assessed on an Agilent BioAnalyser. RIN (RNA  
173 integrity numbers) were compared between different ischemic times and different  
174 asservation methods (blue: shock frozen in liquid N<sub>2</sub>; red: RNAlater, 1 day 4 °C;  
175 green: RNAlater, 7 days 4°C; all samples were stored at -80°C thereafter.

176

177 **Influence of asservation method and cold ischemic times**  
178 **on gene expression**

179 RIN values only give a global impression of RNA integrity, precisely of the integrity of  
180 18S and 28S rRNA. mRNAs might be prone to more or less rapid degradation or  
181 changes in expression profile. We therefore measured the expression levels of 5  
182 mRNAs by qRT-PCR on a LC480 light cycler device. All results were normalized to  
183 the content of 18S rRNA, as measured by qRT-PCR. The genes tested were TBP as  
184 a housekeeping gene, EGFR, ERCC1 and RRM1 as genes with potential predictive  
185 roles for lung cancer therapy, and HIF1 as a gene regulated by hypoxia, at least  
186 partially on RNA level. Reliable results were obtained with all RNA samples. As  
187 expected, expression levels varied between the four patients to a great extent. To  
188 compare gene expression between patients, we used the mean measured values of  
189 all 12 tested samples (Fig. 4). Mean expression values of the housekeeping gene  
190 TBP varied by a factor of 2 between individual patients. The maximal interindividual  
191 difference was 40 % for ERCC1, 60 % for RRM1 and 280 % for HIF1. A 23fold

192 variation was found for EGFR, with the squamous cell carcinoma sample showing  
193 the highest expression.

194 Intraindividually, between the samples of one patient, variability was mostly within the  
195 range of a factor of 2, and ranging up to a factor of 5 in rare cases. There was no  
196 general trend towards lower mRNA content for longer ischemic delay, or for one of  
197 the preservation methods. None of the genes seems to be more susceptible to  
198 degradation within 3 hours after sampling. Fig. 5 exemplarily shows the results for  
199 HIF1, demonstrating the arbitrary distribution of variation.

200 As expected, the greatest source of variation is introduced by interpatient differences  
201 in expression, superposing the influence of all other variables. In order to draw a  
202 more general conclusion about the comparability of the preservation methods, we  
203 normalized the data for each individual patient and each gene separately to the mean  
204 values of all 12 samples for this patient. Doing so, absolute expression levels no  
205 longer influence further analysis, and data oscillate around 1, with relative variation  
206 unaffected. It thus became possible to match genes with great differences in  
207 expression levels. A repeated measures ANOVA was used for hypothesis testing on  
208 differences between the preservation methods ( $p = 0.450$ ) and the different ischemic  
209 times ( $p = 0.963$ ). The variation for the average normalized expression values within  
210 the set of the 12 samples per patient for individual genes did not show preferences  
211 for a method or shorter ischemic times (Table 3). Scatter plots as well show no  
212 evidence for a trend in ischemic time (Fig. 6).

213 To further evaluate the conformance of the methods, we performed Bland-Altman  
214 analyses (Fig. 7). Agreement between RNAlater RNA-preserving methods is slightly  
215 stronger (95% of expected relative deviations lie between 0.48 and 2.00) than  
216 between any of the RNA-later preserving methods and the liquid nitrogen snap

217 freezing method (95% of expected relative deviations lie between 0.33 and 2.38), but  
218 there is no evident trend favoring one or the other method.

219

220 **Table 3: Variation for average gene expression**

| Time points | Mean  | Std. Error | 95% Confidence Interval |             |
|-------------|-------|------------|-------------------------|-------------|
|             |       |            | Lower Bound             | Upper Bound |
| 5(±2)       | 1.010 | 0.083      | 0.745                   | 1.275       |
| 20(±5)      | 0.997 | 0.085      | 0.728                   | 1.266       |
| 60(±10)     | 1.030 | 0.056      | 0.853                   | 1.207       |
| 180(±10)    | 0.963 | 0.095      | 0.659                   | 1.267       |

221

| Methods     | Mean  | Std. Error | 95% Confidence Interval |             |
|-------------|-------|------------|-------------------------|-------------|
|             |       |            | Lower Bound             | Upper Bound |
| N2          | 1.100 | 0.093      | 0.805                   | 1.395       |
| RNAlater 1d | 0.962 | 0.074      | 0.726                   | 1.199       |
| RNAlater 7d | 0.937 | 0.052      | 0.773                   | 1.102       |

222 Variation for the average normalized gene expression values for individual genes  
223 with regard to ischemic time and asservation method as assessed by repeated  
224 measure ANOVA.

225

226 **Fig. 4. Expression levels of 5 mRNAs in 4 patients**

227 Copy numbers were determined by qRT-PCR, normalized to 18S rRNA content as  
228 measured by qRT-PCR. Mean values of 12 aliquots are presented for each patient  
229 (blue: patient 1; red: patient 2; green: patient 3; purple: patient4).

230

231 **Fig. 5. Expression of HIF1 mRNA**

232 Expression was measured by qRT-PCR in four individual patients. Samples were  
233 either fresh frozen in liquid nitrogen (blue), or preserved in RNAlater for 1 day (red) or  
234 7 days (green) before long term storage at -80 °C.

235

236 **Fig. 6. Variability between asservation methods and ischemic delay times.**

237 Mean normalized expression values of five selected genes. Individual expression  
238 levels were normalized to means for each gene and patient and then averaged over  
239 all patients for four different ischemic time points. Asservation methods: blue: liquid  
240 N<sub>2</sub>; red: RNAlater, 1day; green: RNAlater, 7d

241

242 **Fig. 7. Scatterblots of mRNA expression values**

243 Samples were processed in RNAlater (1 or 7 days) or by snap freezing in liquid  
244 nitrogen. Assuming a log-normal distribution of expression values, all computations  
245 were performed on a log scale.

246

247 **Fig. 8. Conformance of RNA processing**

248 Bland-Altman Plot demonstrating the conformance of RNA processing in RNAlater for  
249 24 h or 7 days or snap freezing in liquid N<sub>2</sub>. The colours represent the different  
250 ischemic times (black 5', red 20', green 60', blue 180').

251

252 **Discussion**

253 Biobanks constitute research infrastructures, providing samples for a wide variety of  
254 scientific purposes and methods. Randomly collected samples are compiled into  
255 cohorts with specific features such as diseases or therapies. It is of outstanding  
256 importance, that during the procedure of sample collection, processing and storage,  
257 the inherent characteristics of the samples are preserved, while introducing as little  
258 alterations as possible. Immediate stabilization of the expression pattern is a  
259 prerequisite if samples are to be used in mRNA expression analysis later.

260

261 Several authors could demonstrate good overall DNA and RNA stability and  
262 preservation of the global expression profile has been demonstrated in various ex  
263 vivo or post mortem conditions (1-3). Nevertheless, in tissues, briefly after harvesting,  
264 changes in the mRNA expression pattern are suspected to and have been shown to  
265 occur in a fraction of mRNAs, and is more pronounced if the tissue is exposed to  
266 room temperature rather than kept on ice (1, 3). This may be due to degradation  
267 processes, but also due to transcriptional changes induced by the altered  
268 environment, like lack of oxygen supply, and may vary in different types of tissue.

269  
270 The gold standard to ensure preservation of the in vivo expression profile is to collect  
271 samples in a very standardized way, and to keep the time from harvesting to freezing  
272 as short as possible. Clinical studies or population based efforts of biobanking,  
273 collecting samples in the study context, adhere to strict standard operation  
274 procedures for sample acquisition. Sample collection in clinical context follows a  
275 different concept of biobanking. At the time of collection there is no specific scientific  
276 question or no specific sample characteristic to define inclusion criteria, however,  
277 samples are collected during routine clinical procedures, at various sites of the clinic,  
278 and often as remains after completion of several diagnostic procedures. A 100 %  
279 standardization of preanalytic procedures is thus impossible.

280 There are several ways to minimized intersample variability: keeping time from  
281 sample acquisition to freezing as short as possible, standardizing samples handling  
282 once arrived in the biobank's lab and the use of protective reagents such as  
283 RNAlater, among others.

284

285 RNAlater is a high salt ammonium sulfate aqueous solution specified to stabilize RNA  
286 in solid tissue by precipitating out RNAses in a concentration and ph-dependent  
287 manner, which has been describe as early as 1974 (5).

288

289 Several studies have demonstrated good preservation of expression profiles in  
290 RNAlater preserved vs shock frozen tissue. This holds true for selected genes as  
291 measured by real-time PCR (6-9), and for RNA expression microarray analysis (10-  
292 12). DNA suitable for PCR analysis can be extracted from RNAlater stabilized tissue,  
293 but it remains uncertain whether protein analysis is possible in these samples. It has  
294 been shown, that quantitative proteomic analysis yields comparable results for snap  
295 frozen and RNAlater preserved biopsies of colon mucosa (13). Preliminary  
296 experiments using protein extracts of NSCL cancer biopsies in Western Blots  
297 suggest, that the protein and phospho-protein analysis will also be possible for  
298 selected proteins, but it remains to be demonstrated that this is generally conferrable  
299 (data not shown). Further experiments will be needed before the widespread use of  
300 RNAlater samples for protein or proteomic research.

301

302 Another preserving reagent, ProtectAll, will stabilize RNA, DNA and proteins.  
303 However, it has a major disadvantage for clinical biobanking. While RNAlater  
304 preserved tissue samples can be cut on a microtome and stained for histological  
305 analysis, this is not possible with ProtectAll preserved samples, since even at -80 °C  
306 ProtectAll will not be frozen but rather remain gelatinous and therefore samples  
307 cannot be cut. Sample characterization with respect to verification of diagnosis, tumor  
308 cell content etc. is thus not directly possible in these samples.

309 Using RNAlater during routine solid sample collection in various sites in the clinic has  
310 some major advantages: dangerous and expensive handling of liquid nitrogen can be

311 omitted, samples can be placed directly into the preserving agent at the site of  
312 extraction by any clinician and be processed later in the biobank's lab, and nucleic  
313 acids, in particular RNAs, are stabilized. On the other hand, it has to be taken into  
314 account that preservation is not as abrupt as shock freezing in liquid nitrogen, since  
315 RNAlater or any other similar reagent will need to diffuse into the samples. Samples  
316 have to be incubated in RNAlater for at least 24 h to ensure sufficient absorption  
317 before freezing, following the manufacturer's instructions. During this time, RNAlater  
318 will salt out proteins such as RNAses and inhibit their enzymatic activities.

319  
320 To be sure that sample quality of tissues shock frozen or conserved in RNAlater for  
321 various lengths of time is equally high, we compared the quality of total RNA as well  
322 as the expression of 5 different genes including one housekeeping gene (TBP), 3  
323 genes relevant in NSCLC (ERCC1, EGFR, RRM1)(14-18) and one gene (HIF1)  
324 regulated by ischemia at least partially on the mRNA level (19-21) in matched lung  
325 tumor samples processed by the various procedures. As expected, and has been  
326 shown for tissue of other origin (6, 11), we found that the dominant source of  
327 variation is interpatient variability. Neither snap freezing nor RNAlater processing for  
328 24 hours or 7 days introduced relevant differences, neither with regard to overall RNA  
329 quality nor to the expression of the 5 genes tested.

330  
331 RNA degradation after withdrawal of tissue from the body may be due to two major  
332 reasons. First, the altered environment, especially the lack of oxygen supply, may  
333 lead to altered gene expression in the living cells. Second, RNAses may degrade  
334 RNA, which, while the cells in the tissue start to die, will not be resynthesized. In both  
335 cases, after prolonged storage at room temperature outside of the body, changes in  
336 gene expression would be expected. We compared samples that were processed



337 immediately after withdrawal (5 min), or after 20, 60, and 180 min. There was no  
338 effect on the measured expression for any of the genes during this time frame. It can  
339 be assumed that lack of oxygen does not play a major role for the expression of  
340 these genes, and that the cellular structures remain intact for at least up to 3 hours,  
341 keeping RNAses compartmented in lysosomes and thus unable to attack the RNA.

342

343 Care must be taken not to thaw the samples during shipping or further handling such  
344 as preparation of histological slides or isolation of nucleic acids. At this point, another  
345 great advantage of RNAlater preservation comes into the play. In a snap frozen  
346 tissue sample that thaws, RNA will be degraded immediately after thawing, since  
347 freezing/thawing destroys any intracellular compartmentalization and makes RNA  
348 accessible to RNAses. In a RNAlater preserved sample protection is maintained after  
349 freezing/thawing, and intact RNA with unaltered expression levels can be isolated(7,  
350 9) (and own preliminary data, not shown). Though this is not a licence to interrupt the  
351 cold chain, it eases sample handling during analytic procedures, and minimizes  
352 temperature effects e.g. during cutting in a microtome cooled to -30°C.

353

354 In conclusion, RNAlater is a protective reagent with many in the context of clinical  
355 biobanking. As has been shown for tissues of other origin like liver, it is well suitable  
356 for conservation of lung tissue prior to long term storage at -80 °C. In comparison to  
357 snap freezing in liquid nitrogen, samples show the same quality with regard to overall  
358 RNA quality and mRNA expression. Sample handling at different sites of the clinic is  
359 easier and safer and enables samples collection even in parts of the clinic not directly  
360 connected to a laboratory environment.

361

362

## 363 **References**

- 364 1. Micke P, Ohshima M, Tahmasebpour S, Ren ZP, Ostman A, Ponten F, et al.  
365 Biobanking of fresh frozen tissue: RNA is stable in nonfixed surgical specimens.  
366 Laboratory investigation; a journal of technical methods and pathology.  
367 2006;86(2):202-11.
- 368 2. Bär W, Kratzer A, Mächler M, Schmid W. Postmortem stability of DNA.  
369 Forensic Science International. 1988;39(1):59-70.
- 370 3. Gupta S, Halushka MK, Hilton GM, Arking DE. Postmortem cardiac tissue  
371 maintains gene expression profile even after late harvesting. BMC genomics.  
372 2012;13:26.
- 373 4. Carstensen B. Comparing clinical measurement methods: a practical guide:  
374 John Wiley & Sons; 2011.
- 375 5. Allewell NM, Sama A. The effect of ammonium sulfate on the activity of  
376 ribonuclease A. Biochimica et biophysica acta. 1974;341(2):484-8.
- 377 6. Lee SM, Schelcher C, Gashi S, Schreiber S, Thasler RM, Jauch KW, et al.  
378 RNA Stability in Human Liver: Comparison of Different Processing Times,  
379 Temperatures and Methods. Mol Biotechnol. 2012;24:24.
- 380 7. Botling J, Edlund K, Segersten U, Tahmasebpour S, Engstrom M, Sundstrom  
381 M, et al. Impact of thawing on RNA integrity and gene expression analysis in fresh  
382 frozen tissue. Diagnostic molecular pathology : the American journal of surgical  
383 pathology, part B. 2009;18(1):44-52.
- 384 8. Muyal JP, Muyal V, Kaistha BP, Seifart C, Fehrenbach H. Systematic  
385 comparison of RNA extraction techniques from frozen and fresh lung tissues:  
386 checkpoint towards gene expression studies. Diagnostic pathology. 2009;4:9.
- 387 9. Wang Y, Zheng H, Chen J, Zhong X, Wang Y, Wang Z, et al. The Impact of  
388 Different Preservation Conditions and Freezing-Thawing Cycles on Quality of RNA,  
389 DNA, and Proteins in Cancer Tissue. Biopreservation and biobanking.  
390 2015;13(5):335-47.
- 391 10. Chowdary D, Lathrop J, Skelton J, Curtin K, Briggs T, Zhang Y, et al.  
392 Prognostic gene expression signatures can be measured in tissues collected in  
393 RNAlater preservative. J Mol Diagn. 2006;8(1):31-9.
- 394 11. Mutter GL, Zahrieh D, Liu C, Neuberg D, Finkelstein D, Baker HE, et al.  
395 Comparison of frozen and RNAlater solid tissue storage methods for use in RNA  
396 expression microarrays. BMC genomics. 2004;5:88.
- 397 12. Perez-Portela R, Riesgo A. Optimizing preservation protocols to extract high-  
398 quality RNA from different tissues of echinoderms for next-generation sequencing.  
399 Molecular ecology resources. 2013;13(5):884-9.
- 400 13. Bennike TB, Kastaniegaard K, Padurariu S, Gaihede M, Birkelund S,  
401 Andersen V, et al. Proteome stability analysis of snap frozen, RNAlater preserved,  
402 and formalin-fixed paraffin-embedded human colon mucosal biopsies. Data in brief.  
403 2016;6:942-7.
- 404 14. Rosell R, Cecere F, Santarpia M, Reguart N, Taron M. Predicting the outcome  
405 of chemotherapy for lung cancer. Curr Opin Pharmacol. 2006;6(4):323-31.
- 406 15. Ceppi P, Volante M, Novello S, Rapa I, Danenberg KD, Danenberg PV, et al.  
407 ERCC1 and RRM1 gene expressions but not EGFR are predictive of shorter survival  
408 in advanced non-small-cell lung cancer treated with cisplatin and gemcitabine. Ann  
409 Oncol. 2006;17(12):1818-25.
- 410 16. Zheng Z, Chen T, Li X, Haura E, Sharma A, Bepler G. DNA synthesis and  
411 repair genes RRM1 and ERCC1 in lung cancer. N Engl J Med. 2007;356(8):800-8.

- 412 17. Olausson KA, Dunant A, Fouret P, Brambilla E, Andre F, Haddad V, et al. DNA  
413 repair by ERCC1 in non-small-cell lung cancer and cisplatin-based adjuvant  
414 chemotherapy. *N Engl J Med*. 2006;355(10):983-91.
- 415 18. Lord RV, Brabender J, Gandara D, Alberola V, Camps C, Domine M, et al.  
416 Low ERCC1 expression correlates with prolonged survival after cisplatin plus  
417 gemcitabine chemotherapy in non-small cell lung cancer. *Clin Cancer Res*.  
418 2002;8(7):2286-91.
- 419 19. Yu AY, Frid MG, Shimoda LA, Wiener CM, Stenmark K, Semenza GL.  
420 Temporal, spatial, and oxygen-regulated expression of hypoxia-inducible factor-1 in  
421 the lung. *The American journal of physiology*. 1998;275(4 Pt 1):L818-26.
- 422 20. Chamboredon S, Ciais D, Desroches-Castan A, Savi P, Bono F, Feige JJ, et  
423 al. Hypoxia-inducible factor-1alpha mRNA: a new target for destabilization by  
424 tristetraprolin in endothelial cells. *Molecular biology of the cell*. 2011;22(18):3366-78.
- 425 21. Cao CQ, Yan TD, Bannon PG, McCaughan BC. A systematic review of  
426 extrapleural pneumonectomy for malignant pleural mesothelioma. *J Thorac Oncol*.  
427 2010;5(10):1692-703.
- 428

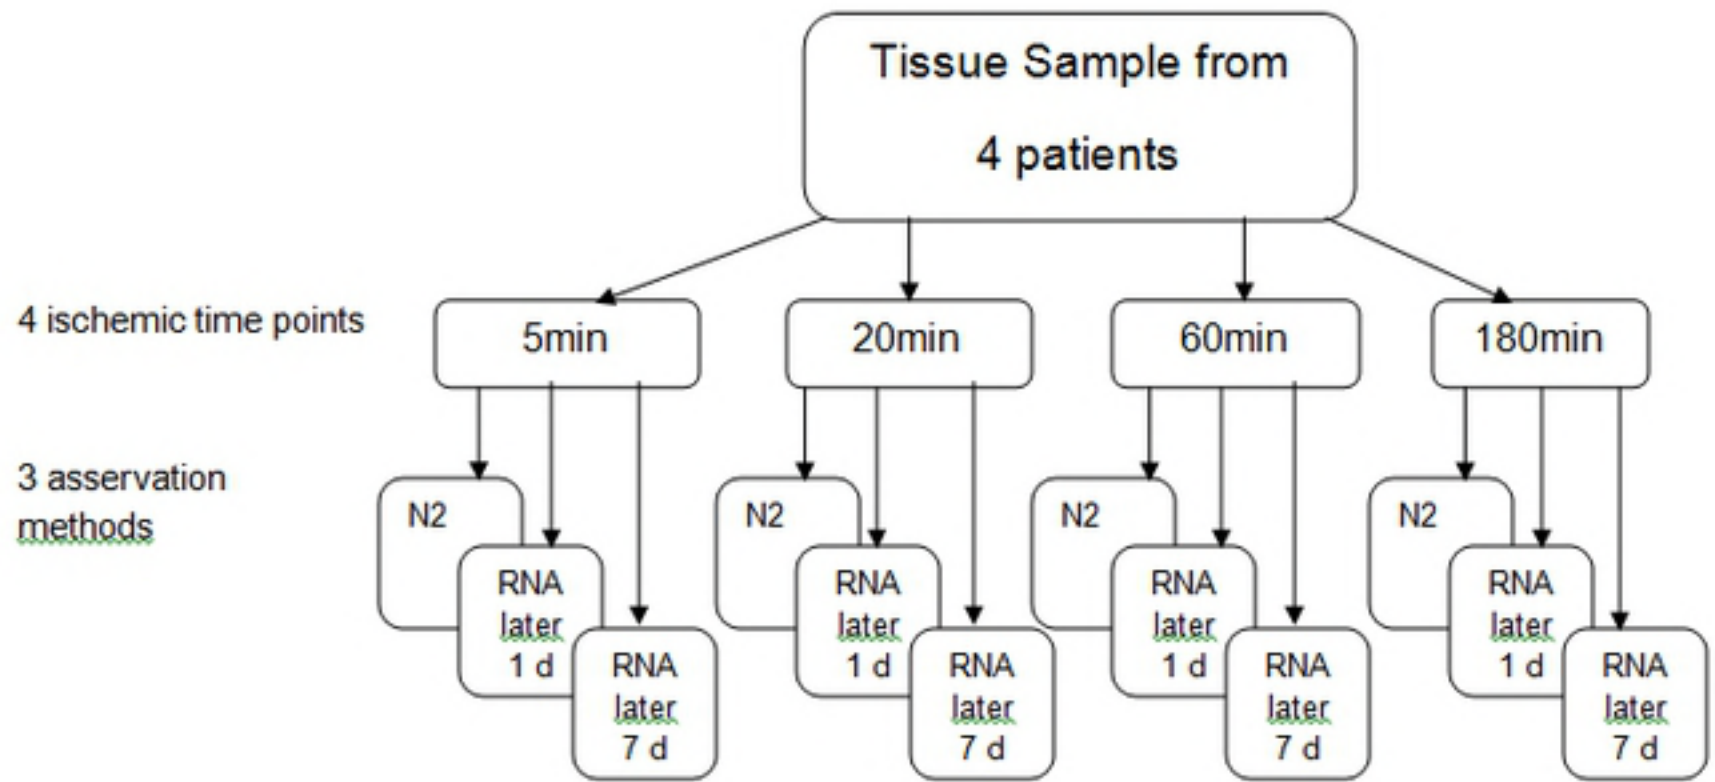

A

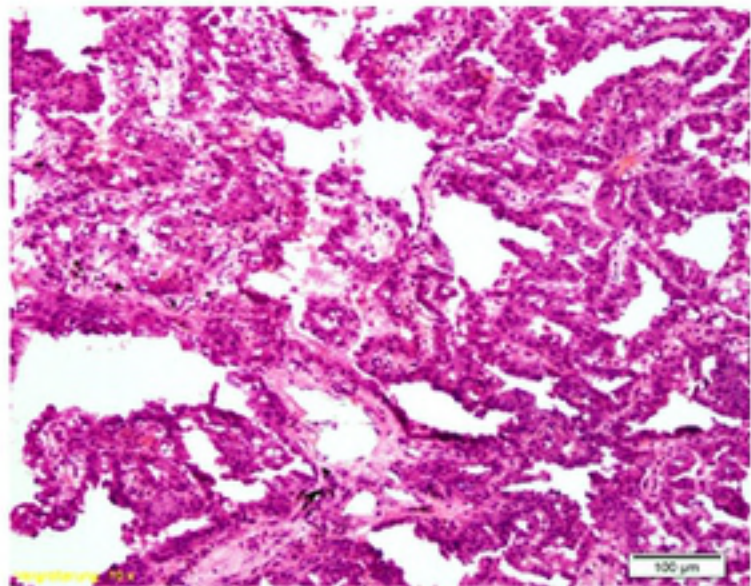

B

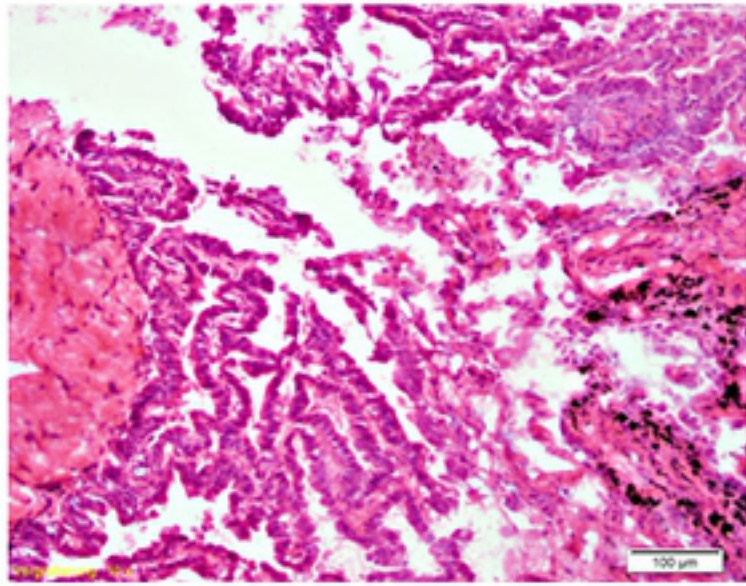



**Pt. 1 large cell neuroendocrine carcinoma**

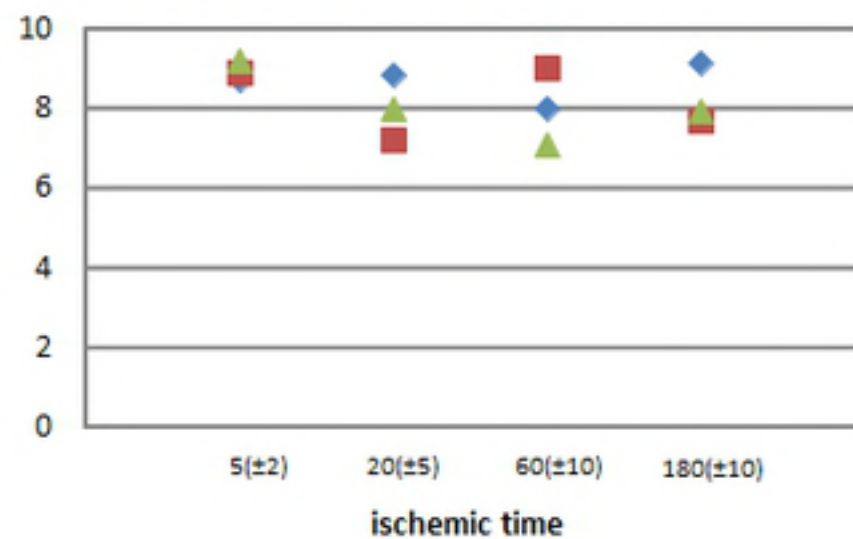

**Pt.2 - adenocarcinoma**

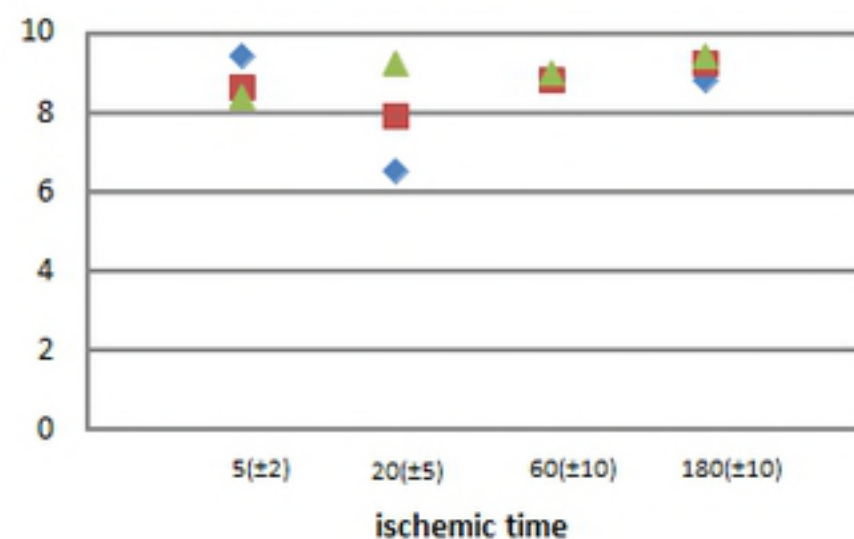

**Pt.3 - squamous cell carcinoma**

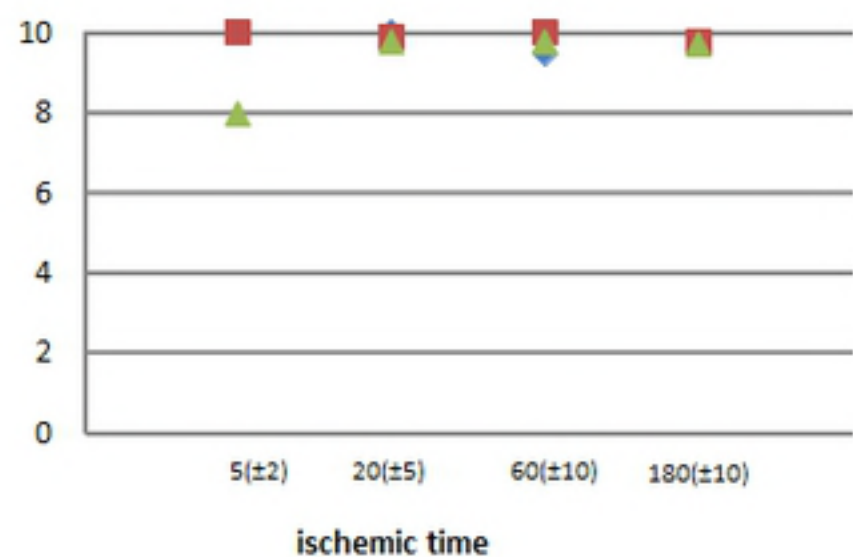

**Pt.4 - typical carcinoid**

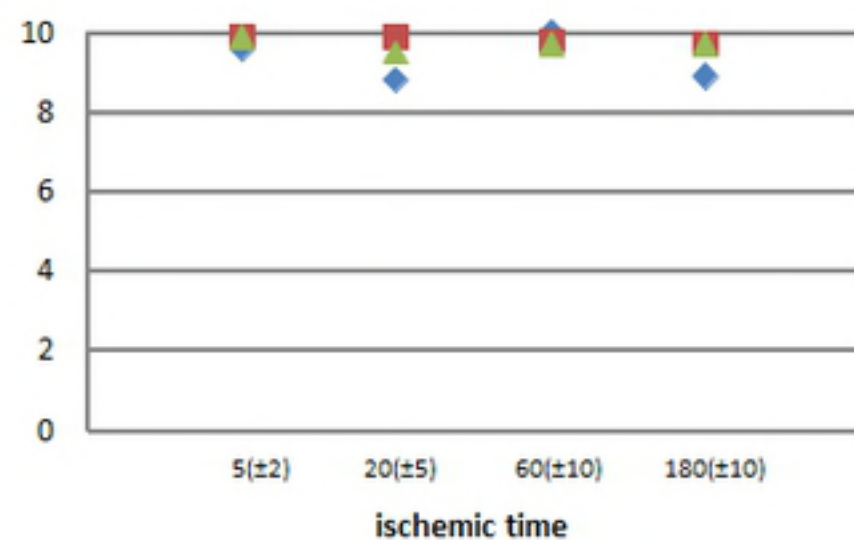

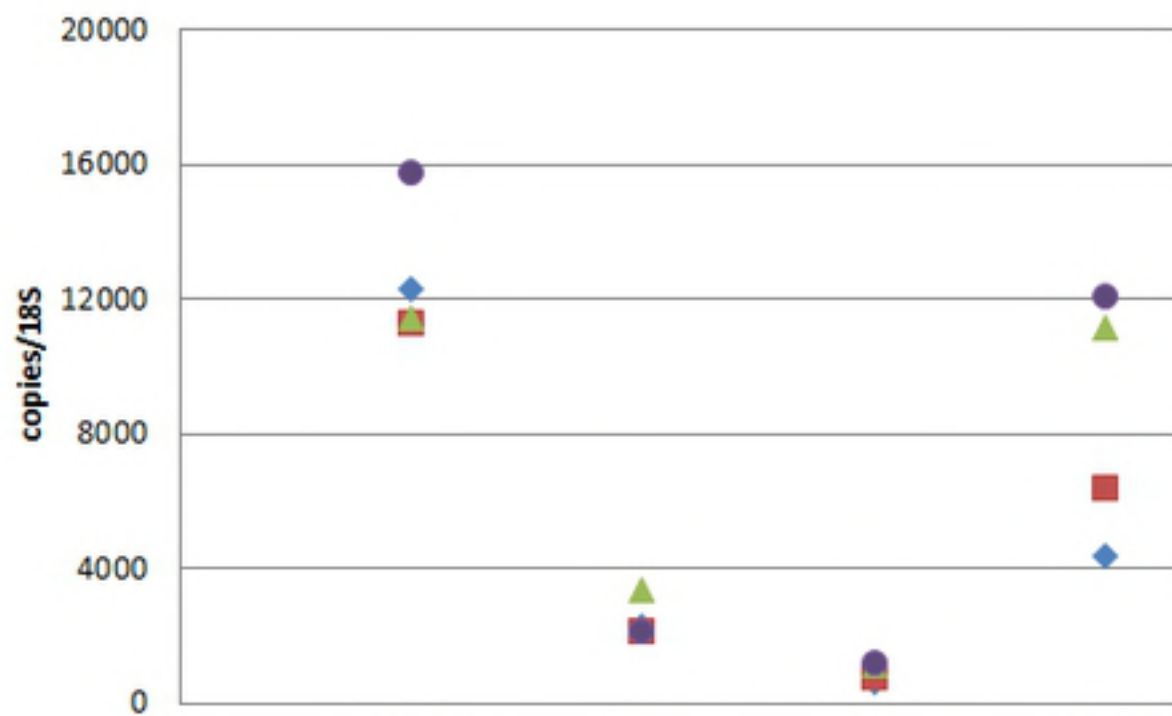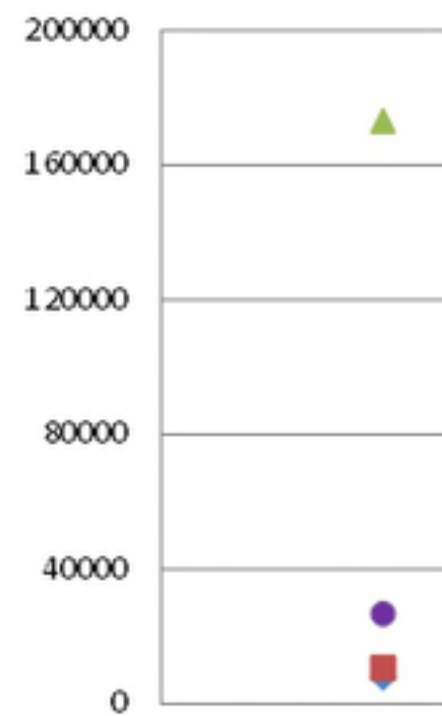

|       | ERCC1 | RRM1 | TBP  | HIF1  |
|-------|-------|------|------|-------|
| Pt. 1 | 12321 | 2273 | 607  | 4357  |
| Pt. 2 | 11309 | 2168 | 777  | 6400  |
| Pt. 3 | 11410 | 3340 | 1117 | 11165 |
| Pt. 4 | 15801 | 2151 | 1200 | 12078 |

|       | EGFR   |
|-------|--------|
| Pt. 1 | 7533   |
| Pt. 2 | 10467  |
| Pt. 3 | 173002 |
| Pt. 4 | 26585  |

Pt.1 HIF1

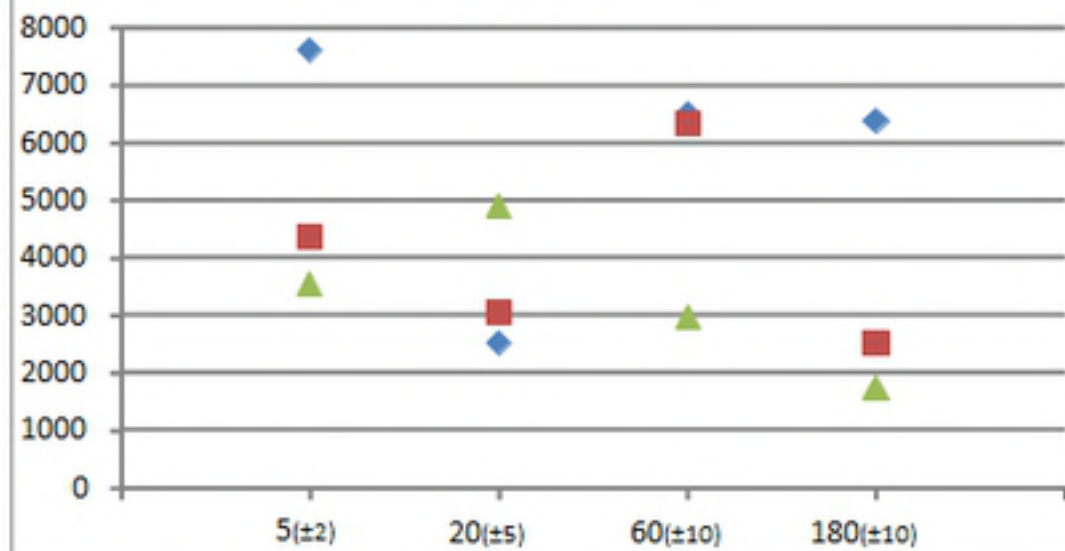

Pt.2 HIF1

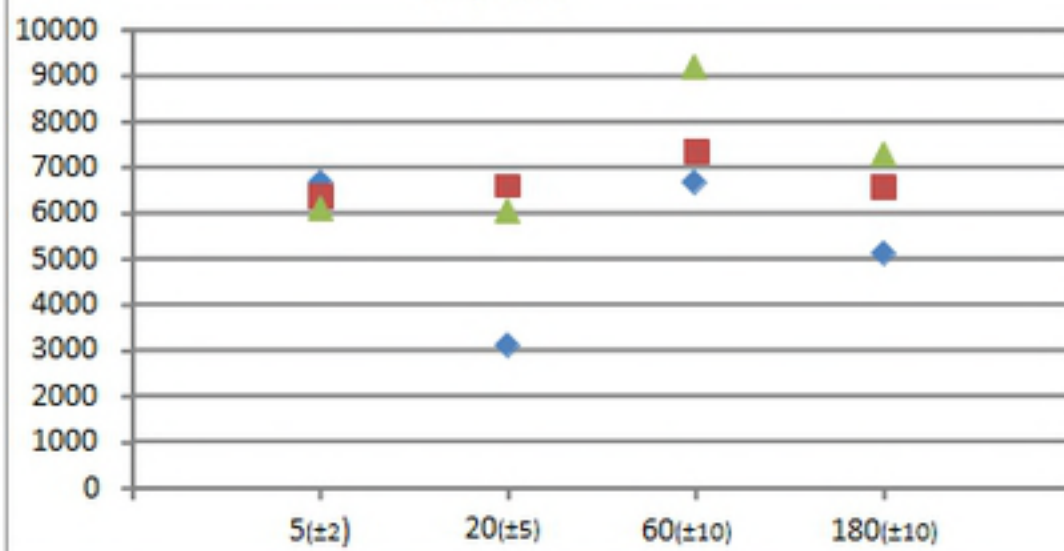

Pt.3 HIF1

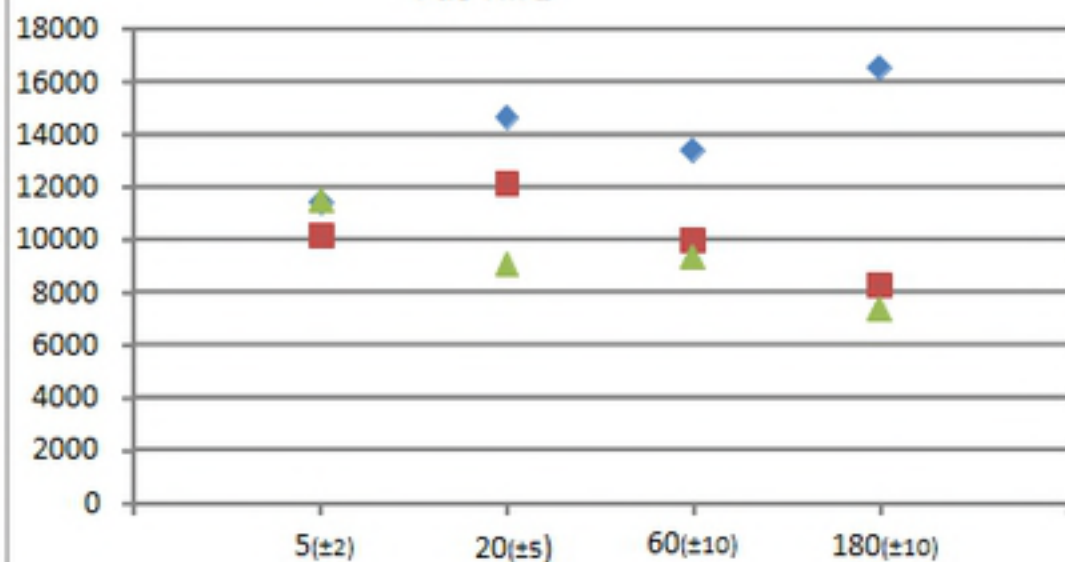

Pt.4 HIF1

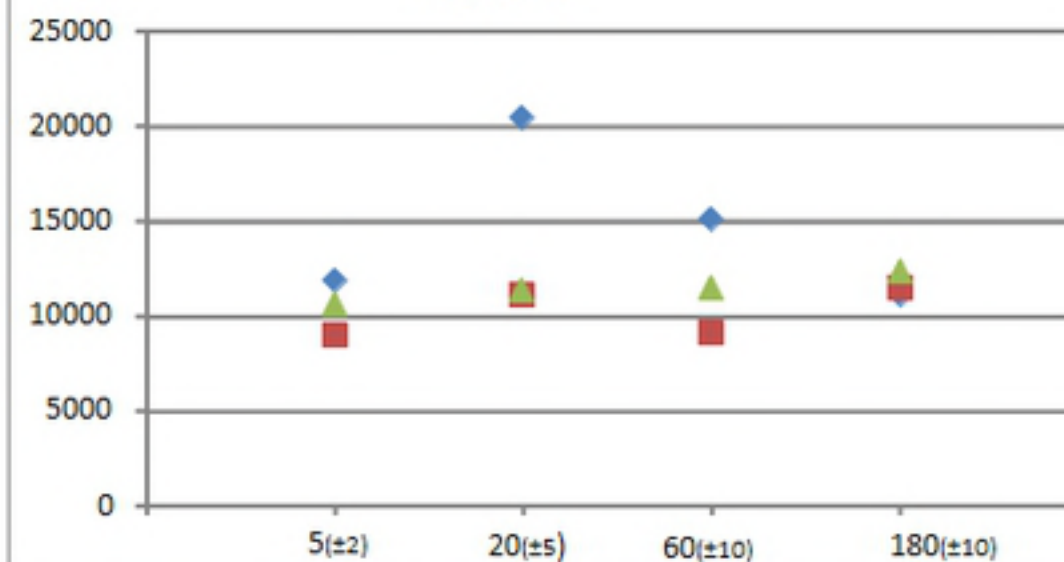



RNAlater 1d

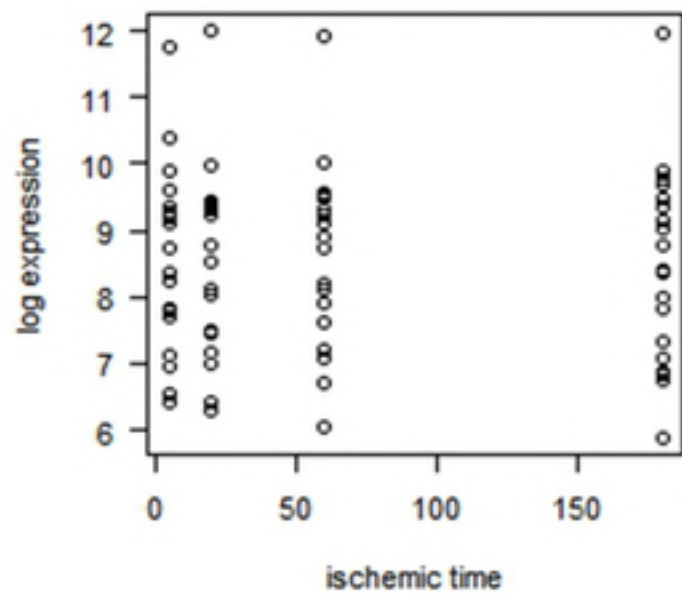

RNAlater 7d

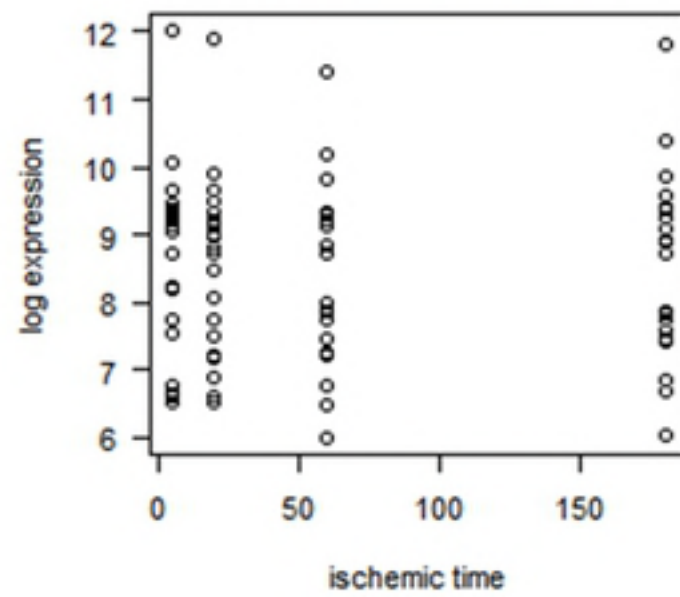

liquid nitrogen

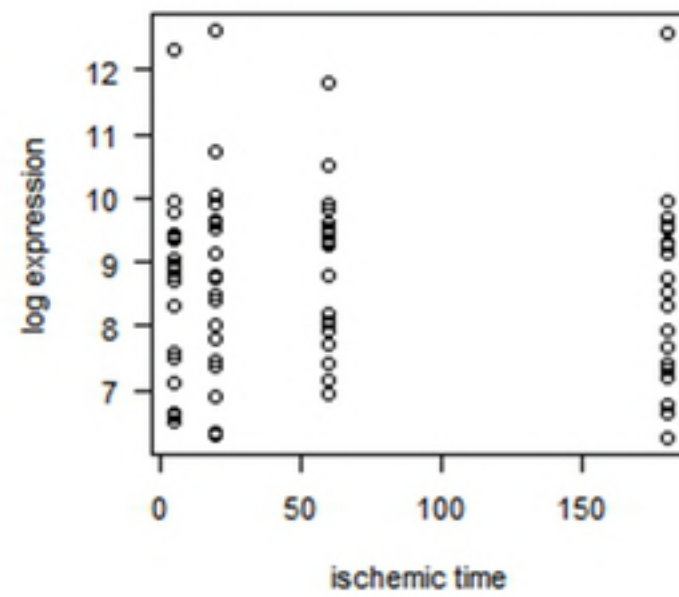

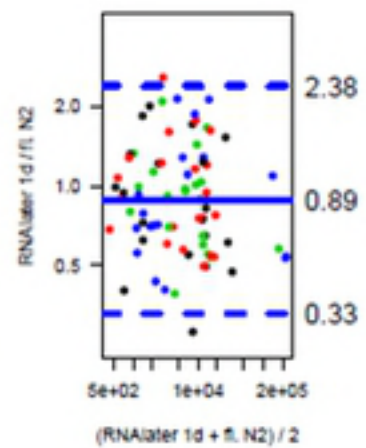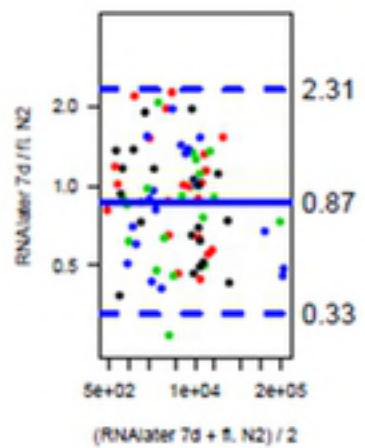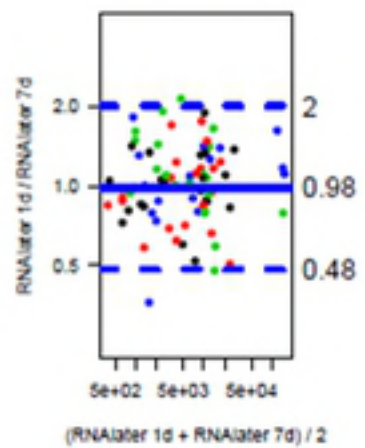

Source: https://www.biorxiv.org/content/10.1101/407411v1.full.pdf
